# Supplementary material for: Loss of neuronal Tet2 enhances hippocampal-dependent cognitive function
Source: PubMed Central journal article supplement — Cell Rep. Author manuscript; Available in PMC 2023 Mar 22. (PMC10032941; doi:10.1016/j.celrep.2022.111612), 2022-11-08
Supplement: NIHMS1848908-supplement-MMC1.pdf [file NIHMS1848908-supplement-MMC1.pdf]

**Cell Reports, Volume 41**

**Supplemental information**

**Loss of neuronal Tet2 enhances**

**hippocampal-dependent cognitive function**

**Karishma J.B. Pratt, Jeremy M. Shea, Laura Remesal-Gomez, Gregor Bieri, Lucas K. Smith, Julien Couthouis, Christopher P. Chen, Irena J. Roy, Geraldine Gontier, and Saul A. Villeda**

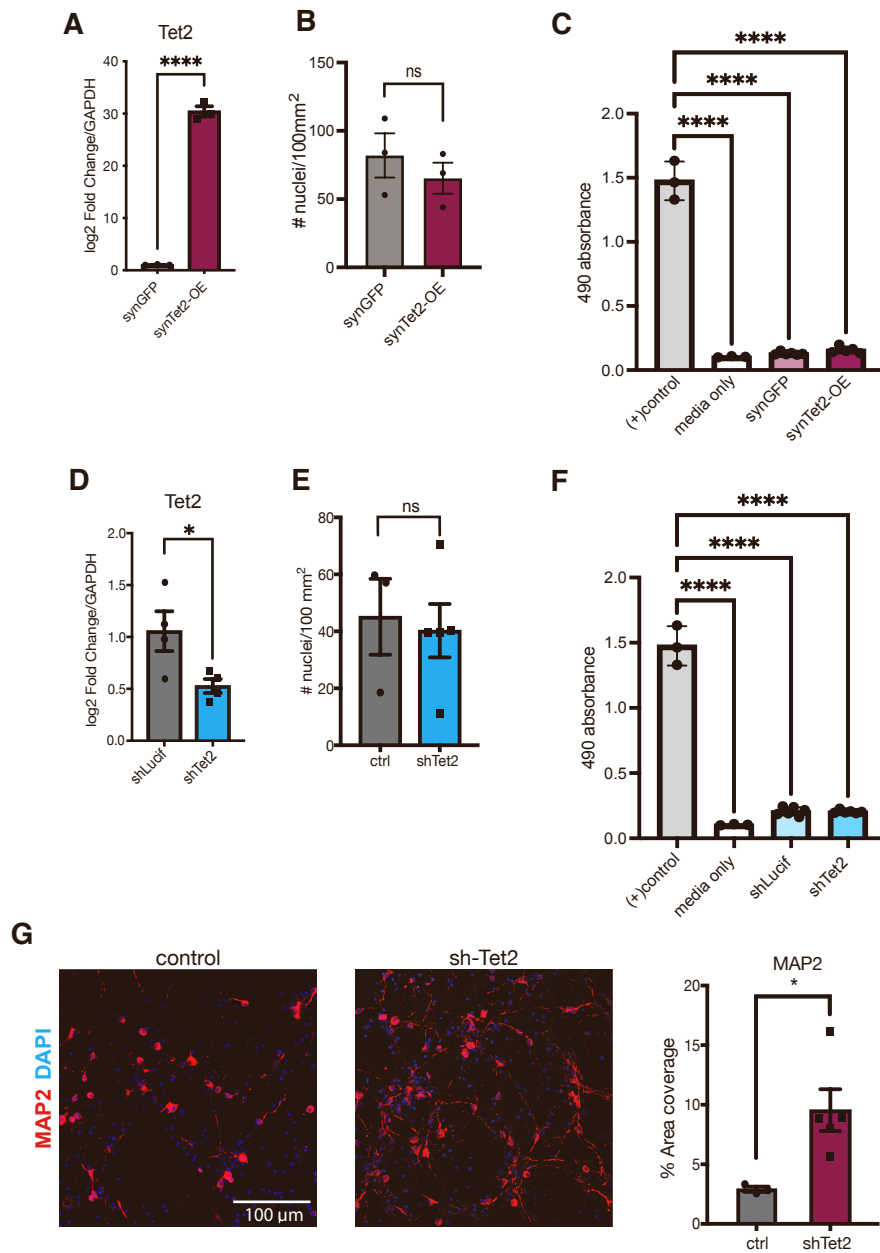

**Figure S1. Tet expression and cell viability in primary neurons following neuronal Tet2 overexpression and abrogation. Related to Figure 1.**

**A**, Quantitative reverse-transcription PCR of Tet2 mRNA from primary neurons infected with lentivirus encoding Tet2 (synTet OE) or GFP control (synGFP) under the control of the neuron-specific Synapsin1 promoter. Log<sub>2</sub> fold change normalized to GAPDH. (n=3 per group; t-test; \*p<0.05).

**B**, Quantification of number of Hoescht-positive nuclei following Tet2 overexpression (n=3 per group, t-test).

**C**, Cytotoxicity was measured by lactate dehydrogenase (LDH) activity as relative absorbance following Tet2 overexpression (n=3 per group, t-test).

**D**, Quantitative reverse-transcription PCR of Tet2 mRNA from primary neurons infected with lentivirus encoding shRNA targeting Tet2 (shTet2) or luciferase control (shCtrl). Log<sub>2</sub> fold change normalized to GAPDH. (n=3-4 per group; t-test; \*p<0.05)

**E**, Quantification of number of Hoescht-positive nuclei following Tet2 abrogation (n=3-5 per group, t-test).

**F**, Cytotoxicity was measured by lactate dehydrogenase (LDH) activity as relative absorbance following Tet2 abrogation (n=5-6 per group, t-test).

**G**, Representative images and quantification of Immunocytochemistry (ICC) for Map2 expression normalized to number of DAPI-positive nuclei. (n=5 per group; t-test; \*p<0.05).

Data are represented as mean +/- SEM.

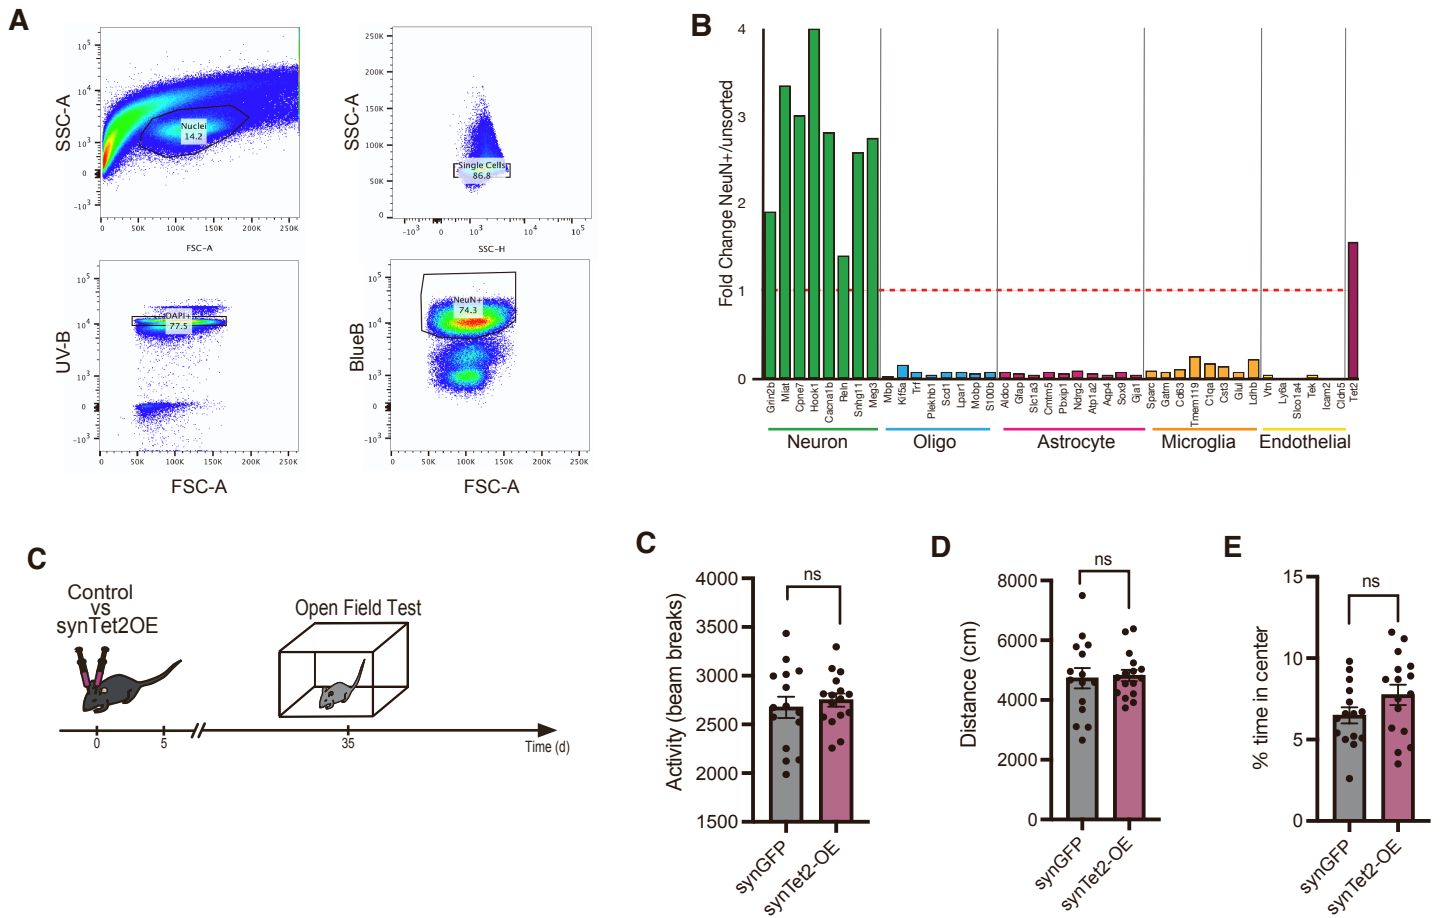

**Figure S2. Validation of neuronal nuclei isolation for cell-type specific sequencing analysis and overall health analysis following in vivo viral-mediated neuronal Tet2 overexpression. Related to Figure 2.**

**A**, Representative fluorescence-activated cell sorting (FACS) gating paradigm for isolation of NeuN-positive neuronal nuclei.

**B**, Fold change of differentially expressed cell-type specific genes between NeuN-positive nuclei and unsorted lysate from RNA sequencing data (all genes adjusted p value with Bonferroni's multiple testing hypothesis correction,  $*p < 0.05$ )

**C**, Schematic of experimental paradigm. Adult (3-4 months) wild type mice were given bilateral stereotaxic injections of lentivirus (LV) encoding either Tet2 (Tet2 OE) or GFP control sequences driven by the neuron-specific Synapsin1 promoter into the hippocampus and subject to behavioral analysis 5 weeks later

**D**, Overall activity was assessed by open field testing and quantified as distance traveled over 10 minutes. (n=15-16 mice per group; t-test)

Data are represented as mean  $\pm$  SEM.

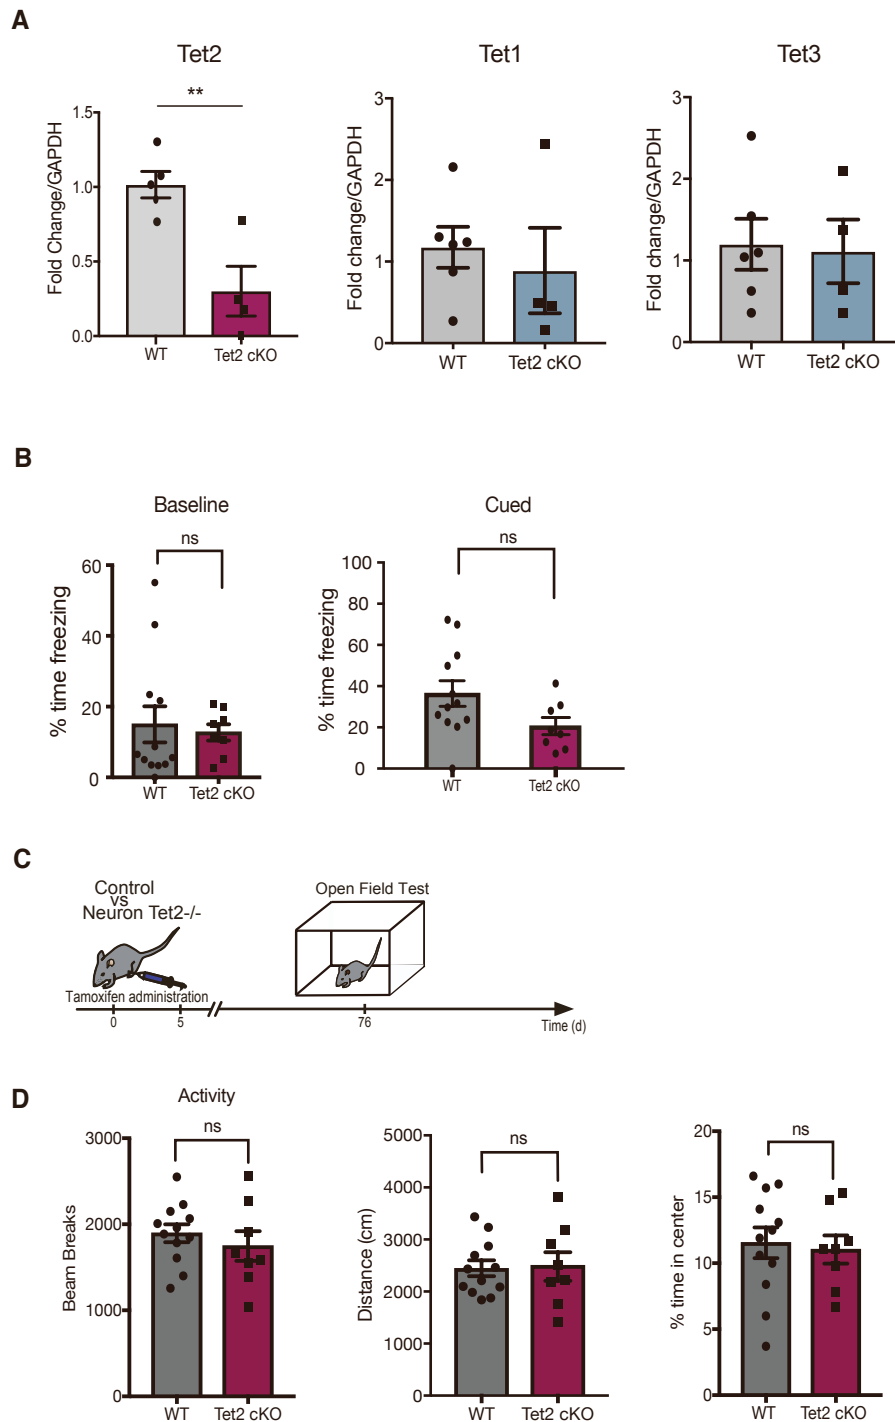

**Figure S3. Tet expression and overall health analysis following temporally controlled in vivo loss of neuronal Tet2. Related to Figure 3.**

**A**, Quantitative reverse-transcription PCR of Tet1, Tet2, and Tet3 mRNA from the hippocampus of adult CamK2aCre-ERT2;Tet2 flox/flox (Tet2 cKO) and littermate Tet2 flox/flox control (WT) mice following tamoxifen administration. Log2 fold change normalized to GAPDH. (n=4-5 mice per group; t-test; \*\*p<0.01)

**B**, Associative fear memory was assessed in Tet2 cKO and WT mice using fear conditioning paradigms. Baseline freezing was quantified as percent freezing in the first two minutes of training. (n=8-12 mice per group; t-test)

**C**, Tet2 cKO and littermate WT control mice were administered tamoxifen and subject to behavioral assays after four months.

**D**, Overall activity was assessed by open field testing and quantified as distance traveled over 10 minutes. (n=8-12 mice per group; t-test)

Data are represented as mean +/- SEM.
